# Supplementary material for: Calcium mediated interaction of calf-thymus DNA with monolayers of distearoylphosphatidylcholine: a neutron and X-ray reflectivity study
Source: Royal Society of Chemistry journal article supplement (doi:10.1039/c3sm50350j), 2013-01-01
Supplement: c3sm50350j.pdf [file c3sm50350j.pdf]

## SUPPLEMENTARY DATA

### Calcium mediated interaction of calf-thymus DNA with monolayers of distearoylphosphatidylcholine: a neutron and X-ray reflectivity study

Jonathan Talbot,<sup>a,b</sup> Aleksandra P. Dabkowska,<sup>a</sup> Leide Cavalcanti,<sup>c</sup> John R.P. Webster,<sup>d</sup> Andrew Nelson,<sup>e</sup>  
David J. Barlow,<sup>a</sup> Giovanna Fragneto,<sup>b</sup> M. Jayne Lawrence<sup>a</sup>

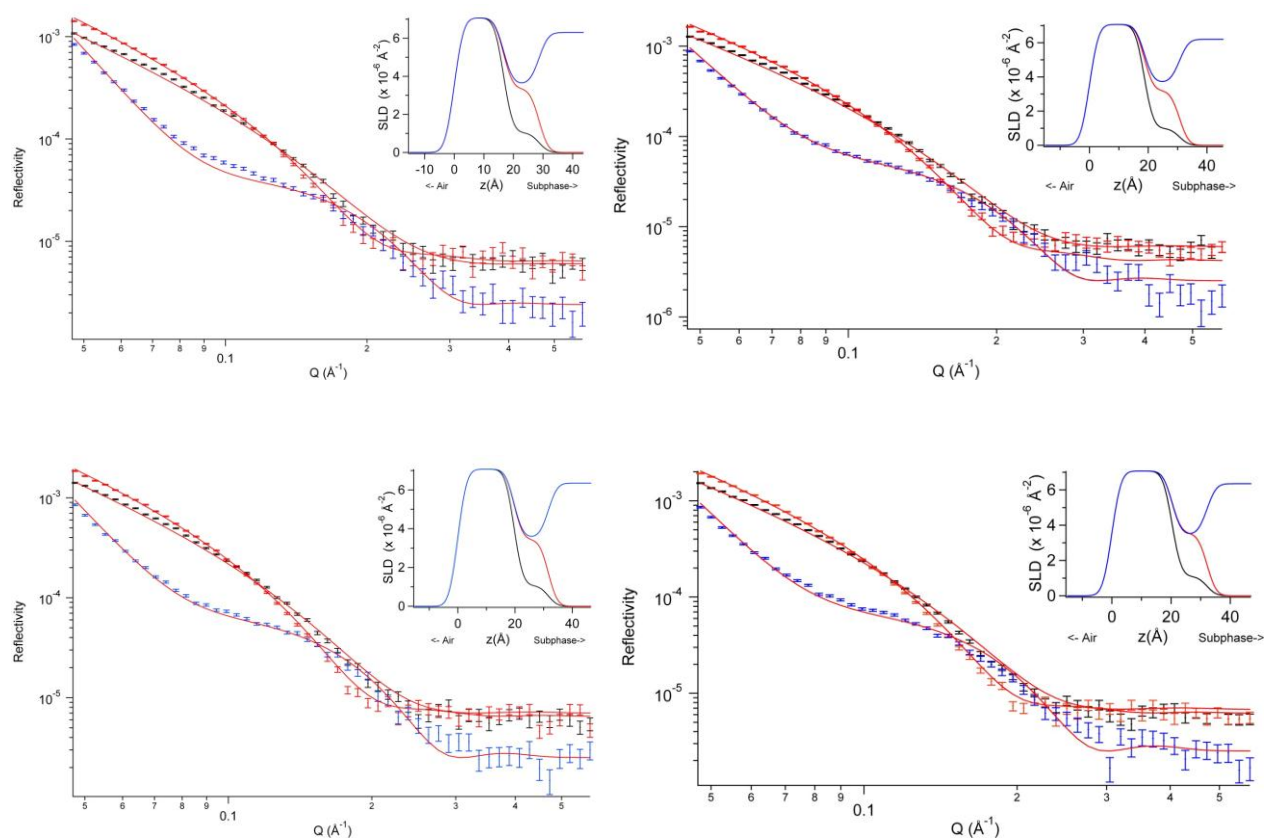

**Supplementary Figure 1.** Measured and fitted reflectivity profiles for DSPC monolayers on a sub-phase containing 20mM  $\text{CaCl}_2$  - with Motofit simultaneous fitting of a two-layer model using the data for  $d_{70}$ -DSPC on acmw (black),  $d_{83}$ -DSPC on acmw (red) and  $d_{70}$ -DSPC on  $\text{D}_2\text{O}$  (blue). The monolayers were maintained at surface pressures of (A) 10  $\text{mN m}^{-1}$ ; (B) 20  $\text{mN m}^{-1}$ ; (C) 30  $\text{mN m}^{-1}$ ; and (D) 40  $\text{mN m}^{-1}$ . Insert to each figure shows the scattering length density profiles calculated from the fit to that data set as a function of the interface in the  $z$ -direction.

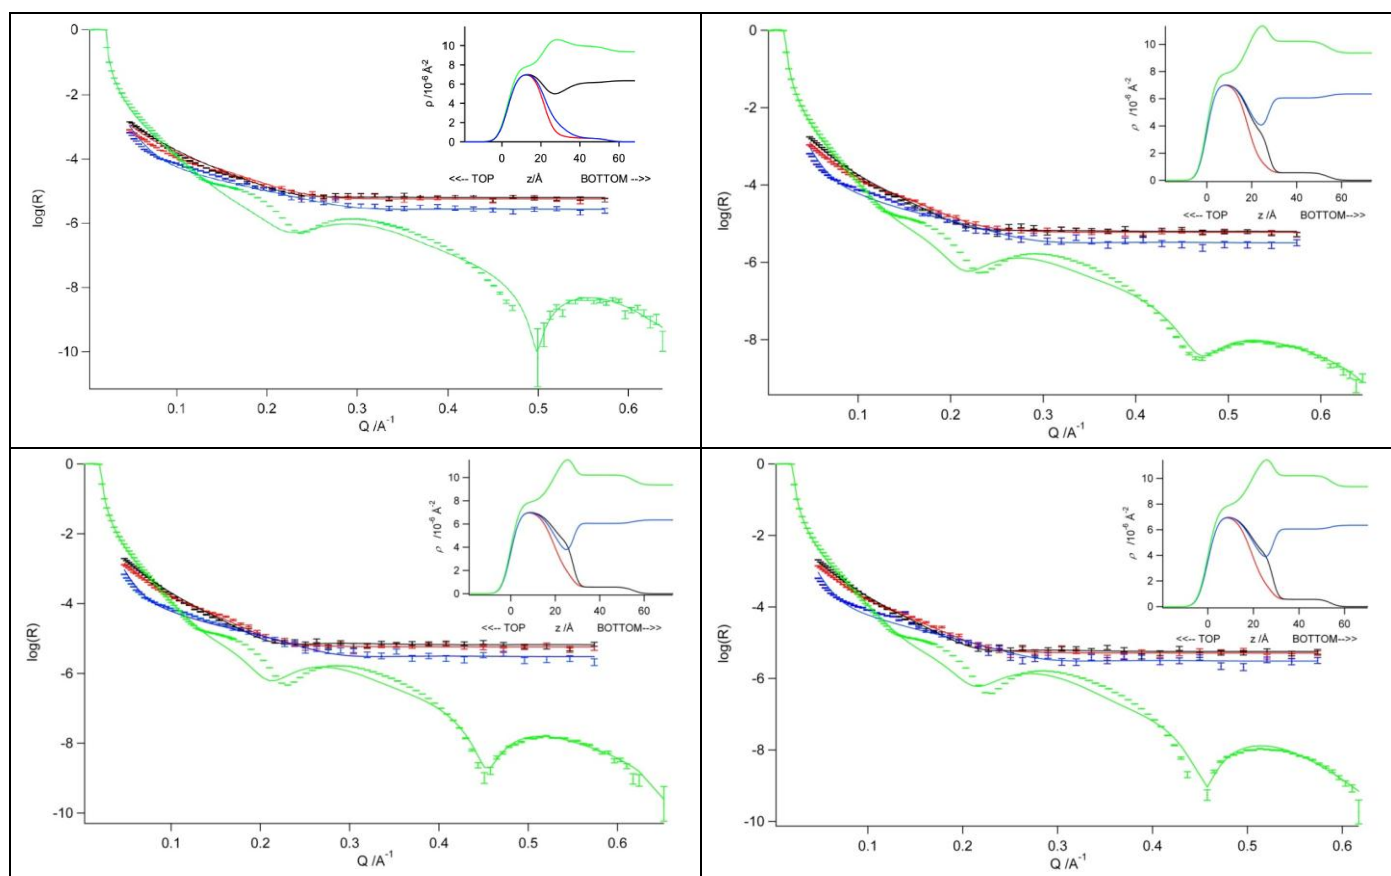

**Supplementary Figure 2.** Measured and fitted reflectivity profiles for DSPC monolayers on a sub-phase containing 20mM  $\text{CaCl}_2$  and DNA (0.067 mg/mL) - with Motofit simultaneous fitting of a three-layer model using the data for  $d_{70}$ -DSPC on acmw (black),  $d_{83}$ -DSPC on acmw (red),  $d_{70}$ -DSPC on  $\text{D}_2\text{O}$  (blue) and  $h$ -DSPC on  $\text{H}_2\text{O}$ . The monolayers were maintained at surface pressures of (A)  $10 \text{ mN m}^{-1}$ ; (B)  $20 \text{ mN m}^{-1}$ ; (C)  $30 \text{ mN m}^{-1}$ ; and (D)  $40 \text{ mN m}^{-1}$ . Insert to each figure shows the scattering length density profiles calculated from the fit to that data set as a function of the interface in the  $z$ -direction.
